# Supplementary material
Source: MDPI journal article supplement (https://www.mdpi.com/2076-3417/10/21/7646)
Supplement: s1 [file s1]

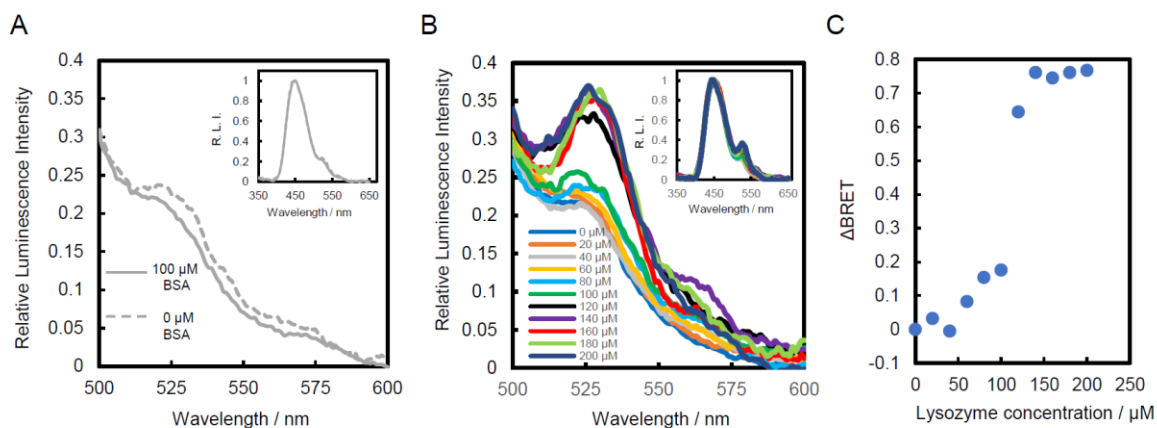

**Figure S1.** Evaluation of lysozyme-binding DNA aptamer-VpRNH conjugates with and without target molecules. Normalized emission spectra of lysozyme-binding DNA aptamer-VpRNH conjugate in the presence of BSA (A) and lysozyme (B). Change in BRET ratio ( $\Delta$ BRET) as a function of lysozyme concentration (C).

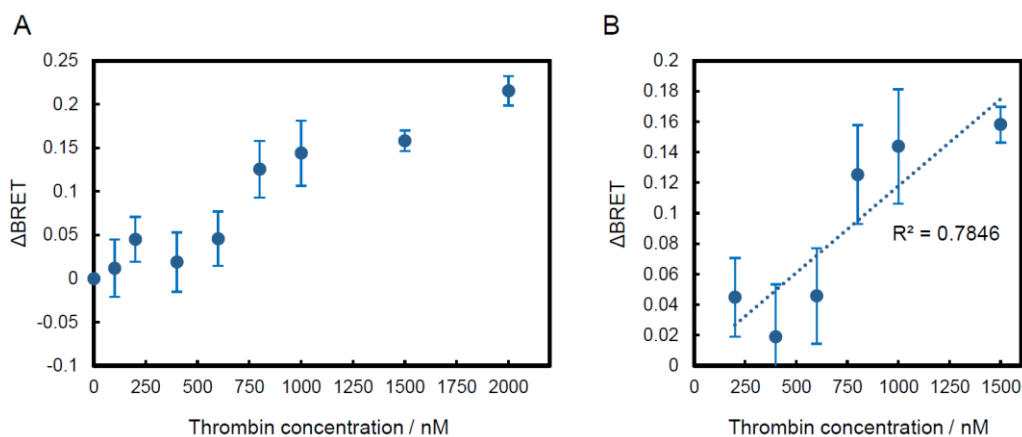

**Figure S2.**  $\Delta$ BRET of thrombin of thrombin-binding DNA aptamer-VpRNH conjugate as a function of thrombin concentration (A). Correlation of  $\Delta$ BRET and thrombin concentration between 200 and 1500 nM (B); each value represents the mean of 4 replicates ( $n=4$ ).
